# Supplementary material for: Physical reservoirs based on MoS2–HZO integrated ferroelectric field-effect transistors for reservoir computing systems
Source: Royal Society of Chemistry journal article supplement (doi:10.1039/d3nh00524k), 2024-01-01
Supplement: d3nh00524k1.pdf [file d3nh00524k1.pdf]

## Supporting Information

### Physical Reservoirs based on MoS<sub>2</sub>-HZO Integrated Ferroelectric Field-effect Transistors for Reservoir Computing Systems

Lingqi Li,<sup>a</sup> Heng Xiang,<sup>a</sup> Haofei Zheng,<sup>a</sup> Yu-Chieh Chien,<sup>a</sup> Ngoc Thanh Duong,<sup>a</sup> Jing Gao,<sup>a</sup> and Kah-Wee Ang<sup>\*a</sup>

Department of Electrical and Computer Engineering, National University of Singapore, 4 Engineering Drive 3, 117583, Singapore

E-mail: [eleakw@nus.edu.sg](mailto:eleakw@nus.edu.sg)

#### S1. Demonstration of 1D-FeFET array

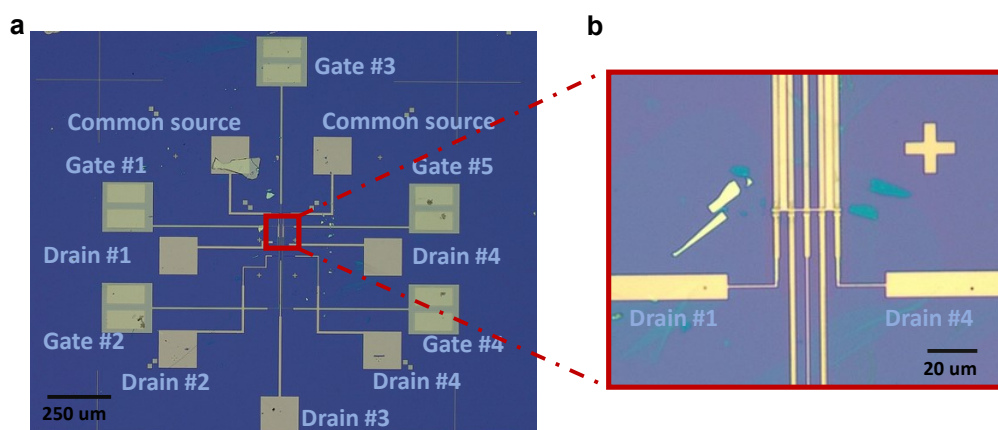

**Fig. S1** (a) Microscopic image of the device array utilized in this study, with a scale bar of 250 μm. (b) Zoomed-in view highlighting the flake isolation.

## S2. EDX results of MoS<sub>2</sub>-HZO FeFETs

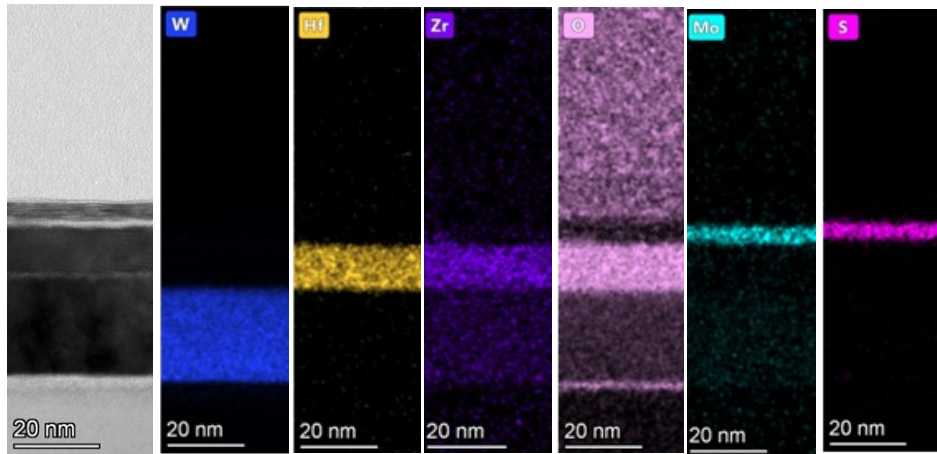

**Fig. S2** EDX map comprises W, Hf, Zr, O, Mo, and S elements.

## S3. FORC measurement schedule

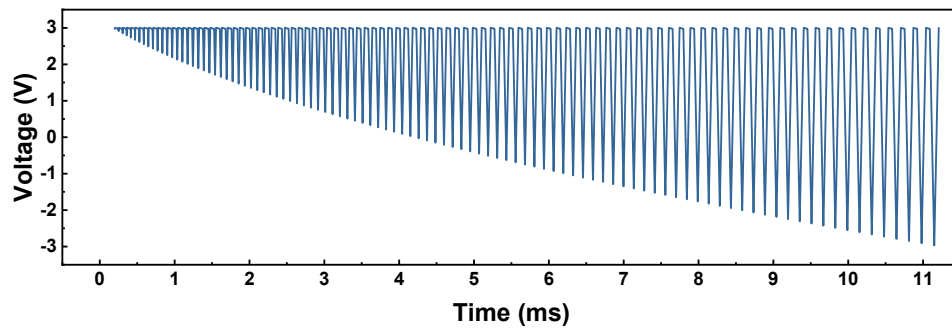

**Fig. S3** Electric field for the FORC measurement using MFM capacitor. The reversal electric field ( $E_r$ ) changes from 3.0 to -3.0 V with a step of -0.01 V, and the external field descends from 3.0 V to  $E_r$ , and then ascends to 3.0 V.

## S4. Switching current for the NLS model fitting

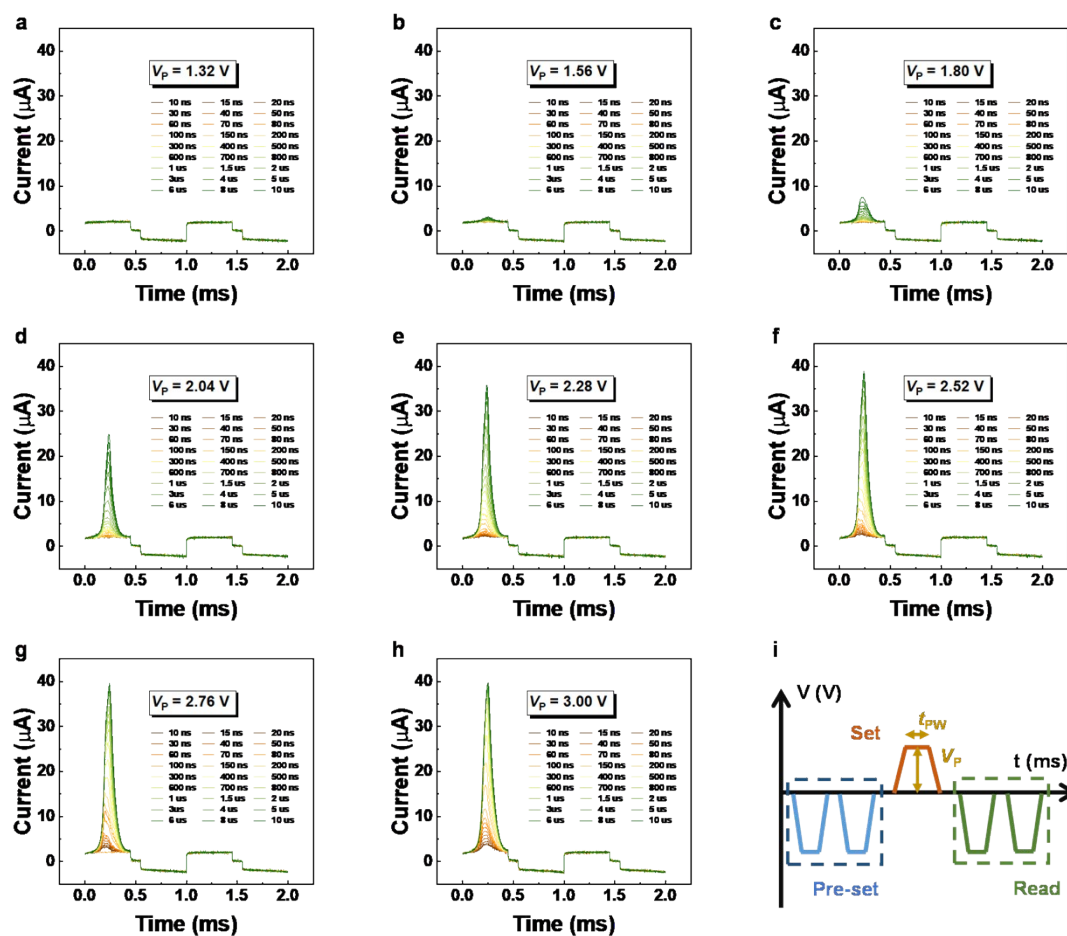

**Fig. S4.** Switching current at different program voltage ( $V_p$ ) with varying programming duration ( $t_p$ ). (a) - (h) The  $V_p$  changes from 1.32 to 3.00 V, with a step of 0.24 V, and the  $t_p$  varies from 10 ns to 10  $\mu\text{s}$  for each  $V_p$ . (i) Illustration of the switching current measurement setup.

## S5. Deconvolution of varied results with different ozone pulse time

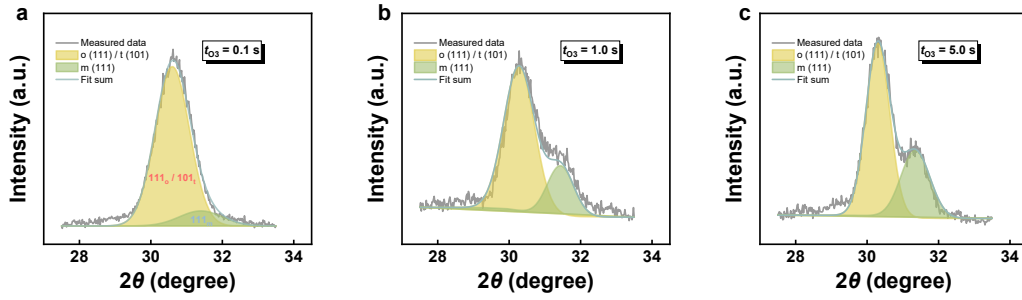

**Fig. S5** Deconvoluted XRD results in the  $2\theta$  range of  $27.5^\circ$ - $33.5^\circ$  varied from  $t_{O_3}$  of a) 0.1 s, b) 1.0 s, and c) 5.0 s.

## S6. Long accumulation of response currents

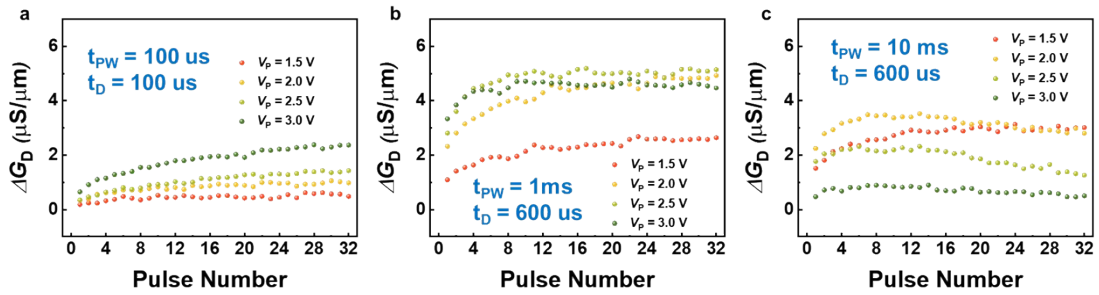

**Fig. S6** Synaptic behavior by modulation of the conductance states with the pulse trains. Identical programming bias ( $V_p$ ) is introduced from 1.5 V to 3 V for all the input pulse scheme. The read voltage ( $V_R$ ) of 0.5 V with  $V_D = 0.5$  V is fixed to all the input pulse trains. (a)  $t_{PW} = 100 \mu s$ ,  $t_D = 100 \mu s$  (b)  $t_{PW} = 1 ms$ ,  $t_D = 600 \mu s$  and (c)  $t_{PW} = 10 ms$ ,  $t_D = 600 \mu s$ .

One can observe that when we apply a short program pulse width ( $t_{PW}$ ), the conductance difference ( $\Delta G_D$ ) significantly increase with higher programming gate bias ( $V_p$ ). These observations indicating that more dipolar switching in the HZO

ferroelectric layer under larger voltage. On the other hand, when we further increase the  $t_{PW}$ , the  $\Delta G_D$  will not be directly proportional to the magnitude of  $V_p$ , which can be attributed to the serious trapping effect reduce the current. When we further increase the  $t_{PW}$ , the electron trapping become seriously which led the  $\Delta G_D$  smaller. This experimental result is consistent with previous reports<sup>1-4</sup> that the ferroelectric response is faster than the trapping response.

### S7. Critical Role of Interfacial Layer $\text{Al}_2\text{O}_3$

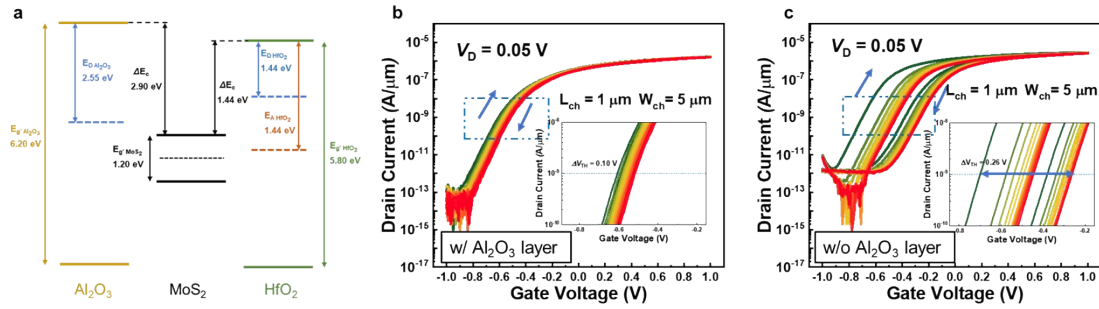

**Fig. S7.** (a) Energy band diagrams showing the band alignment of few-layer  $\text{MoS}_2$  to the high-k dielectric layer of  $\text{Al}_2\text{O}_3$  and  $\text{HfO}_2$ .<sup>5-7</sup> The accurate value of bandgaps, defect levels and band offsets were reported by several previous reports which extracted from the experiments. Transfer characteristics with  $f = 0.5$  Hz at  $V_D = 50$  mV and  $V_G$  from  $-1.0$  V to  $1.0$  V for  $\text{MoS}_2$  FETs (b) with and (c) without  $2$  nm  $\text{Al}_2\text{O}_3$  interface layer on  $10$  nm HZO layer.

The transistor performance will be affected by the interfacial interaction between  $\text{MoS}_2$  and the high-k dielectric layer. In this work, we use a thin  $\text{Al}_2\text{O}_3$  layer ( $\sim 2$  nm) works as the interfacial layer between  $\text{MoS}_2$  and the ferroelectric HZO layer to minimize the detrimental charge trapping effect. As shown in the depicted energy

band diagrams (**Fig. S7a**), the acceptor-like traps (dark red) of  $\text{HfO}_2$  are adjacent to the  $\text{MoS}_2$  intrinsic Fermi level which energetically favorable to charge trapping effect. Compared with  $\text{HfO}_2$ , the oxide defect states in the energy band of  $\text{Al}_2\text{O}_3$  shows the energy difference with the conduction band of  $\text{MoS}_2$  which lead the detrimental charge trapping difficult and will lower the oxide trap density. Therefore, the depicted energy band diagrams confirm that the  $\text{Al}_2\text{O}_3$  align well with the  $\text{MoS}_2$  so that suitable for the transistors.

Subsequently, the  $\text{MoS}_2$  FETs with or without  $\text{Al}_2\text{O}_3$  interface layer are fabricated to verify the aforementioned deduce. Note that all the process except the  $\text{Al}_2\text{O}_3$  deposition was conducted together for these two samples. Then the same measurement scheme at  $V_D$  of 50 mV and the sweeping frequency ( $f$ ) of 0.5 Hz was used for the devices. One can observe that the extracted clockwise hysteresis  $\Delta V_{\text{TH}}$  from the device with  $\text{Al}_2\text{O}_3$  interface layer is much smaller ( $\sim 0.10\text{V}$ ), while the  $\Delta V_{\text{TH}}$  is 0.26 V of the device without  $\text{Al}_2\text{O}_3$  over the same voltage range. Therefore, we have validated that address the interfacial interaction between  $\text{MoS}_2$  and the high-k dielectric layer by  $\text{Al}_2\text{O}_3$  interface layer is suitability.

## S8. MoS<sub>2</sub> FETs with pure Al<sub>2</sub>O<sub>3</sub> gate stack

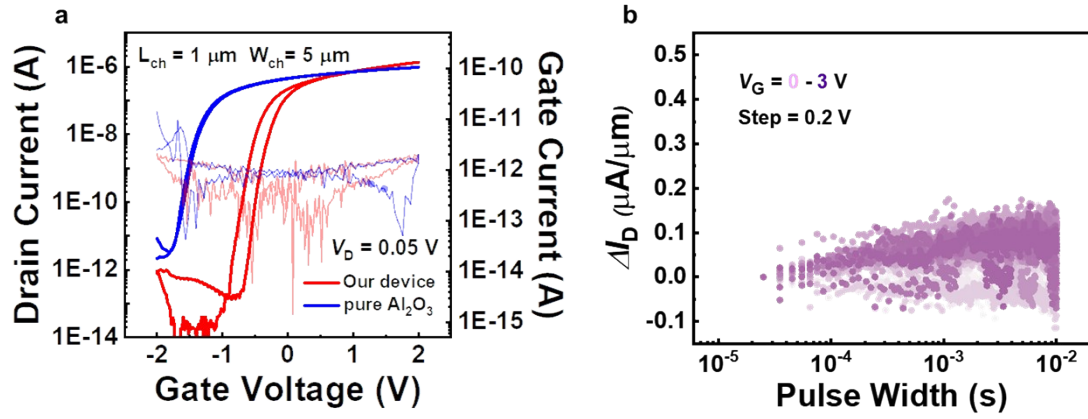

**Fig. S8.** (a) Transfer characteristics and gate leakage current at  $V_D = 50$  mV and  $V_G$  from -2.0 V to 2.0 V for MoS<sub>2</sub> FETs using 12 nm pure Al<sub>2</sub>O<sub>3</sub> or 2 nm Al<sub>2</sub>O<sub>3</sub> stacks with 10nm HZO layer with  $f$  of 0.50 Hz. (b) The dynamic voltage response under a 3.0 V input pulse trains with  $t_{PW} = 100 \mu s$  and  $t_D = 100 \mu s$ .

It is evident that the device based on pure Al<sub>2</sub>O<sub>3</sub> shows a considerably smaller transient drain current compared to the HZO-based device, as shown in Fig. 2e. It confirms that the dynamic behavior observed is attributed to the ferroelectric HZO rather than the interfacial layer Al<sub>2</sub>O<sub>3</sub>. Furthermore, the smaller  $V_{TH}$  in our device can be attributed to enhanced electrical control.

### S9. CV characteristics of the HZO/Al<sub>2</sub>O<sub>3</sub> capacitor

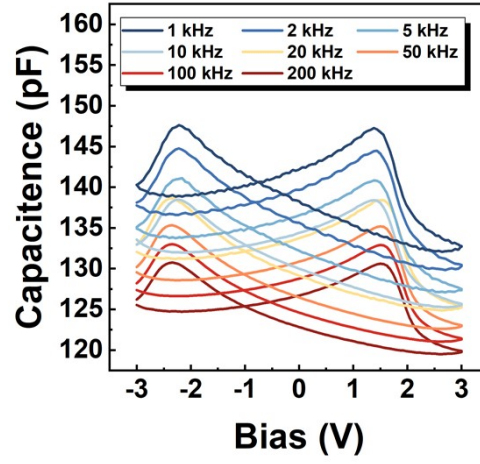

**Fig. S9.** The frequency-dependent capacitance-voltage (CV) characteristics of HZO/Al<sub>2</sub>O<sub>3</sub> capacitor in similar MFM structure as in Fig. 1f. The thicknesses of HZO and Al<sub>2</sub>O<sub>3</sub> are 10 nm and 2 nm, respectively.



## References

- 1 K. Lee, H.-J. Lee, T. Y. Lee, H. H. Lim, M. S. Song, H. K. Yoo, D. I. Suh, J. G. Lee, Z. Zhu, A. Yoon, M. R. MacDonald, X. Lei, K. Park, J. Park, J. H. Lee and S. C. Chae, *ACS Appl. Mater. Interfaces*, 2019, **11**, 38929–38936.
- 2 M. Si, X. Lyu, P. R. Shrestha, X. Sun, H. Wang, K. P. Cheung and P. D. Ye, *Appl. Phys. Lett.*, 2019, **115**, 072107.
- 3 N. Gong, X. Sun, H. Jiang, K. S. Chang-Liao, Q. Xia and T. P. Ma, *Appl. Phys. Lett.*, 2018, **112**, 262903.
- 4 X. Lyu, M. Si, P. R. Shrestha, K. P. Cheung and P. D. Ye, in *2019 IEEE International Electron Devices Meeting (IEDM)*, 2019, p. 15.2.1-15.2.4.
- 5 Y. Y. Illarionov, T. Knobloch, M. Wlatl, G. Rzepa, A. Pospischil, D. K. Polyushkin, M. M. Furchi, T. Mueller and T. Grasser, *2D Mater.*, 2017, **4**, 025108.
- 6 I. Shlyakhov, J. Chai, M. Yang, S. Wang, V. V. Afanas'ev, M. Houssa and A. Stesmans, *physica status solidi (a)*, 2019, **216**, 1800616.
- 7 Y. Y. Illarionov, T. Knobloch, M. Jech, M. Lanza, D. Akinwande, M. I. Vexler, T. Mueller, M. C. Lemme, G. Fiori, F. Schwierz and T. Grasser, *Nat Commun*, 2020, **11**, 3385.
